# Supplementary material for: CaGdF5 based heterogeneous core@shell upconversion nanoparticles for sensitive temperature measurement
Source: Royal Society of Chemistry journal article supplement (doi:10.1039/d3ra00716b), 2023-01-01
Supplement: d3ra00716b1.pdf [file d3ra00716b1.pdf]

SUPPORTING INFORMATION

**CaGdF<sub>5</sub> based heterogeneous core@shell upconversion nanoparticles for sensitive temperature measurement**

**Xiaoyu Xie<sup>a, b</sup>, Wang Wang<sup>a, b</sup>, Haoran Chen<sup>a</sup>, Run Yang<sup>a, b</sup>, Han Wu<sup>a, b</sup>, Dechao Gan<sup>a, b</sup>, Bin Li<sup>a</sup>, Xianggui Kong<sup>a</sup>, Qiqing Li<sup>a, \*</sup> and Yulei Chang<sup>a, \*</sup>**

<sup>a</sup> State Key Laboratory of Luminescence and Applications. Changchun Institute of Optics, FineMechanics and Physics, Chinese Academy of Sciences. Changchun, 130033, Jilin, China.

<sup>b</sup> University of the Chinese Academy of Sciences, Beijing 100049, China.

E-mail: liqiqing0742@sina.cn and yuleichang@ciomp.ac.cn.

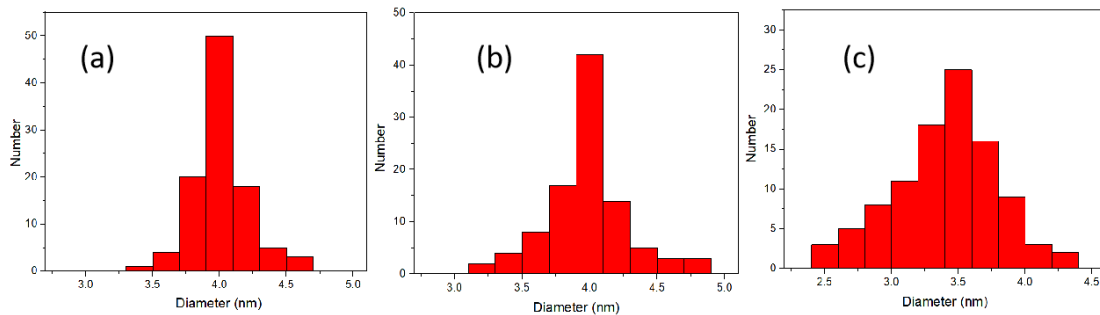

Figure S1. (a-c)Size distribution of the core samples, corresponding to Ca<sup>2+</sup>/Gd<sup>3+</sup> molar ratio of 0:1, 1:1, 2:1, respectively.

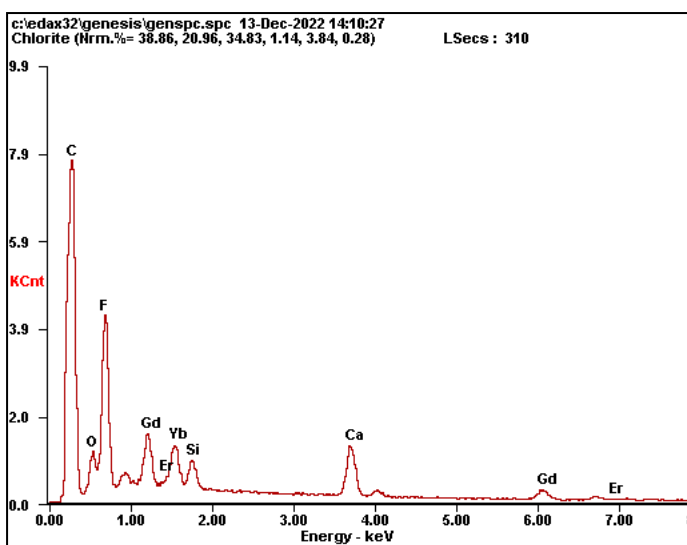

| Element    | Wt %  | At %  |
|------------|-------|-------|
| <i>F K</i> | 32.03 | 73.74 |
| <i>YbM</i> | 17.42 | 04.34 |
| <i>CaK</i> | 11.27 | 12.14 |
| <i>GdL</i> | 38.59 | 10.43 |
| <i>ErL</i> | 00.69 | 00.15 |

Figure S2. Energy dispersive spectra (EDS) of CaGdF<sub>5</sub> with Ca<sup>2+</sup>/Gd<sup>3+</sup> molar ratio of 1:1.

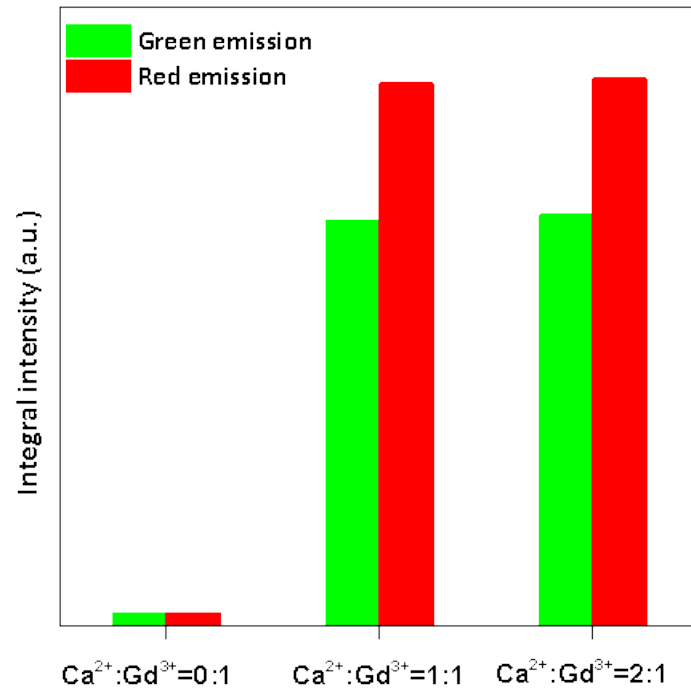

Figure S3. Integral intensities of the core UCNP samples with varied Ca<sup>2+</sup>/Gd<sup>3+</sup> molar ratio.

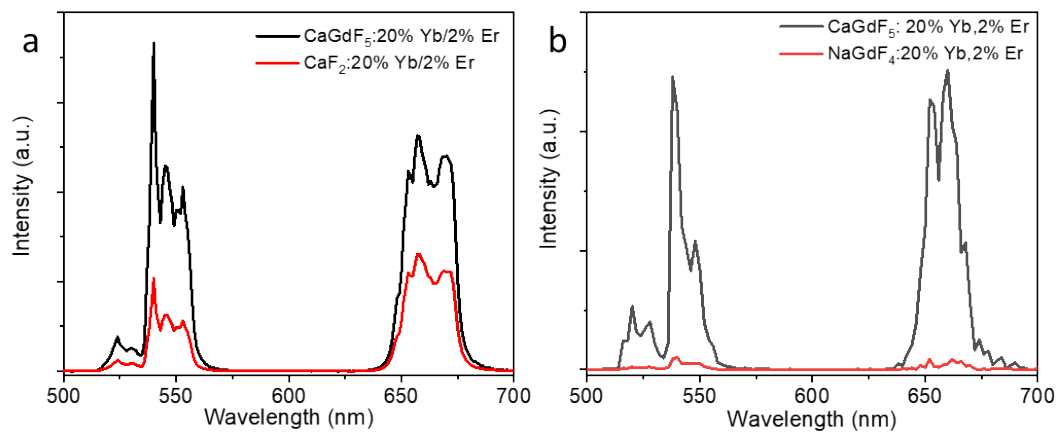

Figure S4. Upconversion emission spectra of (a) CaGdF<sub>5</sub>:20% Yb,2% Er, CaF<sub>2</sub>:20% Yb,2% Er and (b) CaGdF<sub>5</sub>:20% Yb,2% Er, NaGdF<sub>4</sub>:20% Yb,2% Er UCNP samples at 10 W/cm<sup>2</sup>.

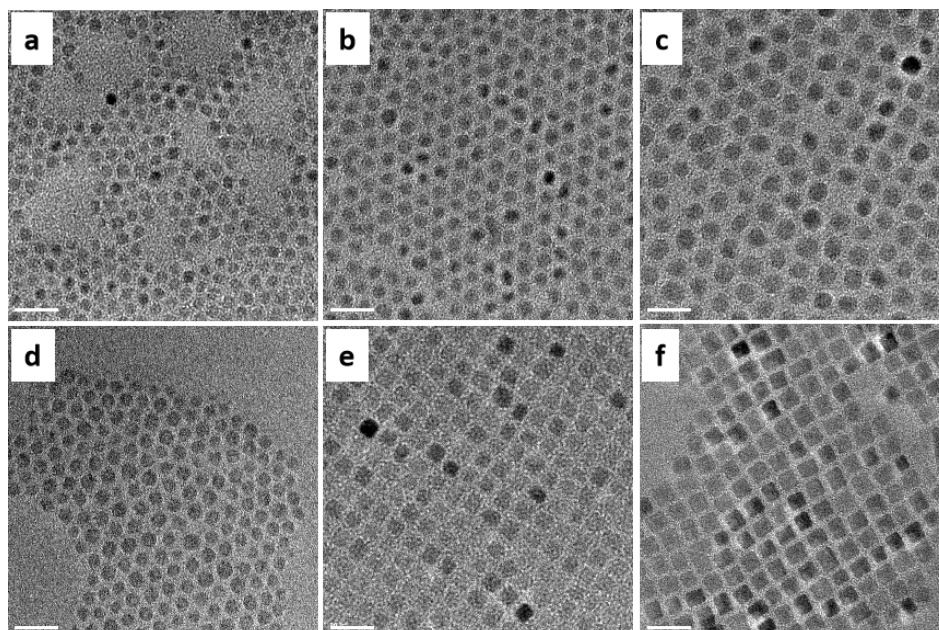

Figure S5. TEM images of (a-c) CGF@CGF and (d-f) CGF@CF UCNPs in 20 min, 40 min, and 60 min, respectively.

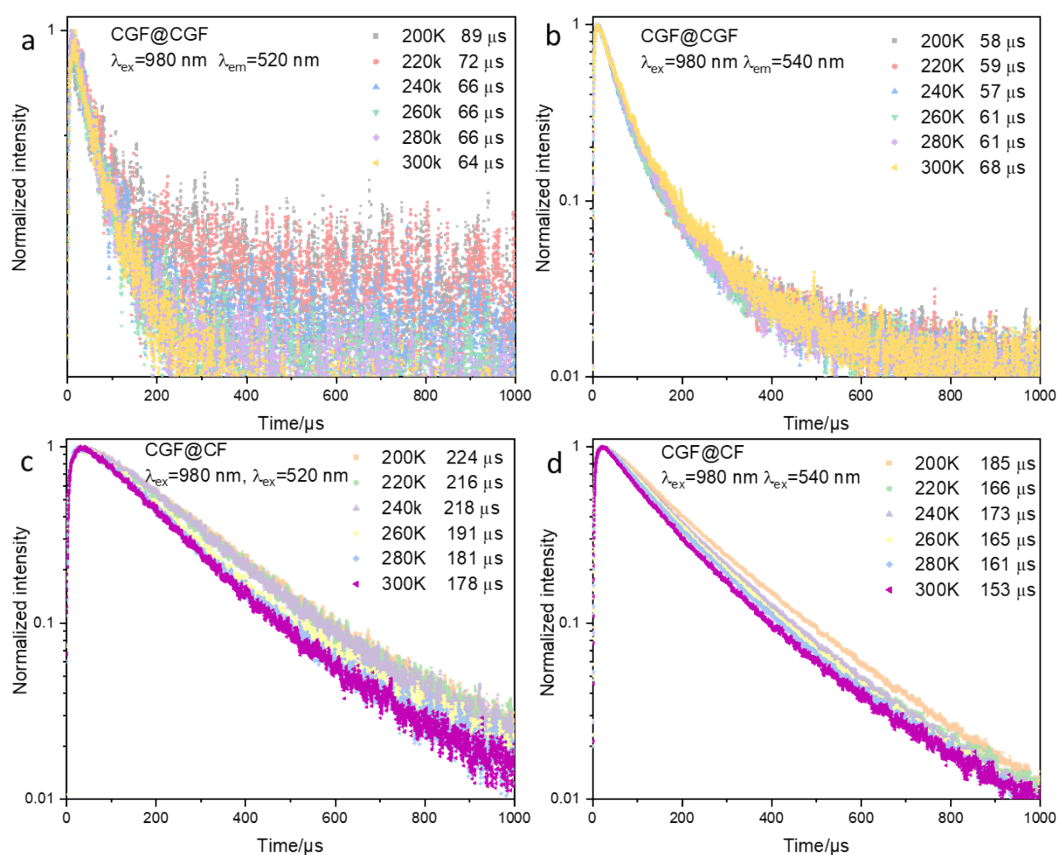

Figure S6. Decay curves of CGF@CGF and CGF@CF under 980 nm excitation at 520 nm, and 540 nm, range from 200 K to 300 K.

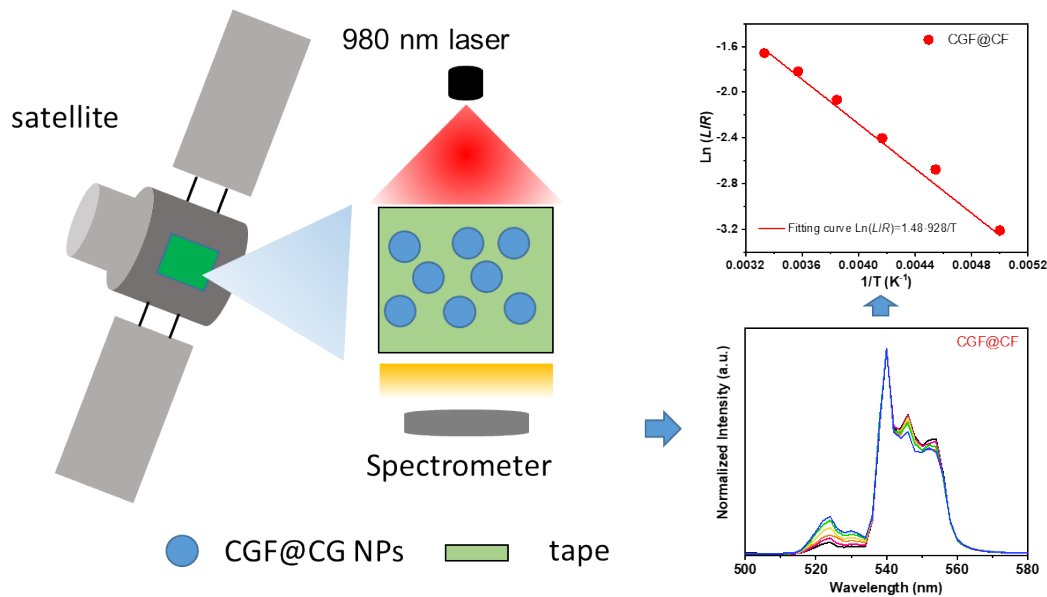

Figure S7. Schematic illustration of in-situ measurement technique in extreme environment.

Table S1. Thermometric performance of RE doped nanoparticles.

| Materials                                         | Temperature range(K) | Max- $S_r$ (%<br>$K^{-1}$ ) | reference |
|---------------------------------------------------|----------------------|-----------------------------|-----------|
| $LaF_3:Yb^{3+}@LaF_3:Nd^{3+}$ NPs                 | 288-323              | 0.74                        | 1         |
| $NaYF_4:Yb^{3+},Er^{3+},25\%Ga^{3+}$ NPs          | 198-498              | 0.46                        | 2         |
| $LiLaP_4O_{12}:Yb^{3+},Er^{3+}$ NPs               | 173-350              | 1.80                        | 3         |
| $NaErF_4@NaYF_4@NaYbF_4:Tm^{3+}@NaYF_4$ NPs       | 293-413              | 0.71                        | 4         |
| $NaYF_4:Yb^{3+},Er^{3+}$ NPs                      | 75-600               | 0.48                        | 5         |
| $Yb_2W_3O_{12}:Er^{3+}@TiO_2:Yb^{3+},Er^{3+}$ NPs | 293-573              | 1.12                        | 6         |
| $CGF:Yb^{3+},Er^{3+}@CF_2$ NPs                    | 200-300              | 2.48                        | This work |

[1] D. Baziulyte-Paulaviciene, N. Traskina, R. Vargalis, A. Katelnikovas, S. Sakirzanovas, Thermal decomposition synthesis of  $Er^{3+}$ -activated  $NaYbF_4$  upconverting microparticles for optical temperature sensing, *Journal of Luminescence*, 215 (2019).

[2] D. Li, Q. Shao, Y. Dong, J. Jiang, Temperature sensitivity and stability of  $NaYF_4:Yb^{3+},Er^{3+}$  core-only and core-shell upconversion nanoparticles *Journal of Alloys and Compounds*, 617 (2014), pp.1-6.

[3] C. Hu, L. Lei, E. Liu, Z. Lu, S. Xu, Improved negative thermal quenching effect of Yb/Er codoped fluoride upconversion nanocrystals via engineering phonon energy, *Journal of Luminescence*, 247 (2022).

[4] S.W. Hao, G.Y. Chen, C.H. Yang, Sensing Using Rare-Earth-Doped Upconversion Nanoparticles, *Theranostics*, 3 (2013), pp. 331-345.

[5] X.F. Wang, Q. Liu, Y.Y. Bu, C.S. Liu, T. Liu, X.H. Yan, Optical temperature sensing of rare-earth ion doped phosphors, *Rsc Advances*, 5 (2015), pp. 86219-86236.

[6] G.G. Lin, D.Y. Jin, Responsive Sensors of Upconversion Nanoparticles, *Acs Sensors*, 6 (2021), pp. 4272-4282.
